# Supplementary material for: Design of 24X7 water supply systems – A Case study: Ahmedabad city
Source: Copernicus journal article supplement (doi:10.5194/dwes-2018-14), 2018-07-04
Supplement: Supplementary file [file dwes-2018-14-AC2-supplement.pdf]

## Responses to the Editor's and Reviewers' Comments

Thank you so much for your such valuable comments which gives us a Chance to defend and explain our though process in a better way regarding our study.

First of all, this research is purely applied research which can directly implement on real life situation and specified for the Ahmedabad city and its water system. Hence, the literature study has been done purely based on similar kind of case only for India, you can refer cited references at end of the paper, and the case study of Malkapur, Maharatsra-India, which has won the national award for successful implementation of 4x7 water supply system and which has been taken as the bench mark for the study, then only it has been selected; along with this pros and cons of the 24x7 water supply system has been studied from the case studies of Hyderabad, Pimpri-Chinchwad and Nagpur cities of India which has ongoing pilot projects for 24x7 water supply system, which clearly justifying that literature study has been done deeply.

- Ok sure We will rearrange the line with reference. (Line-9)  
As following:

“Water is also one of the important physical environments of human and has effect on the health and hygiene of mankind.”

- Ok, sure we will correct that sentence and remove the word ‘Brutal’. (Line-19)  
As following:

“The present water supply practice is non-confirming to designed hydraulic parameters, and also the system is severely affected insufficient hydraulics, leading to many of the current critical issues which keep the Local Authorities in a difficult situation.”

- Thanks for the proposal. Yes, we can definitely make changes according to your comments and give reference of this sentence to the paper. (Line-35)
- Continuous water supply is one of the important norms for the smart city, we have used the word ‘One of the’ we never said that continuous water supply is the Only norms. (Line-40)

“Continuous water supply is also one of the important norms for smart cities. Recently the Government of India has decided to convert 100 cities into smart cities. Ahmedabad has been selected as one of the 100 cities. “

- Yes, we can add 3-4 lines which explain the research methodology (Line-52), which is as below:

“The type of the research is applied research hence, the more weightage has been given to the literature study, literature study has been done on related case studies respectively to the India context. From that Malkapur, (Maharashtra- India) has been selected for the detail case study. After that for designing of 24x7 water supply system, data has been collected from the Ahmedabad Municipal Council (AMC) – Water department. on basis of given parameter pilot ward has been selected for the 24x7 water design. With help of WaterGEMS software design has been done and from the design proposal has been raised and result of the design and selected proposal, economic analysis has been done.”

- Yes, sure we can rearrange Case study (Section III) in a such a way so that it looks like a story telling sequence and not a direct jump. (Line-77-98)

“The scheme for providing 24x7 water supply system in Malkapur (Maharashtra, India) is unique and remarkable as it has won national award for this scheme for successful implementation and running of 24x7 water supply project. The project was implemented under the guideline of Water supply and sanitation department of Maharashtra - Maharashtra Jeevan Pradhikaran (MJP). By considering its all facts Malkapur has been selected as a detail case study for this applied research.”

- In Section IV- study and finding, (Line-102-120) describe the whole scenario of the water supply system in the Ahmedabad city. So, we will add name of the Ahmedabad city so that it easily can understand. (Line-115)
- Yes, last paragraph is the nut shell of the whole study, which is not a result, that’s why it is in general statement of the whole research paper to justifying the tittle. Result of the study has been pointed and explained with the 1-10-point number just above this paragraph. (Line-245-247)
